# Supplementary material
Source: bioRxiv or medRxiv preprint supplement (https://www.biorxiv.org/highwire/filestream/58502/field_highwire_adjunct_files/3/131292-4.pdf)

(A) Distribution of Editors by global region

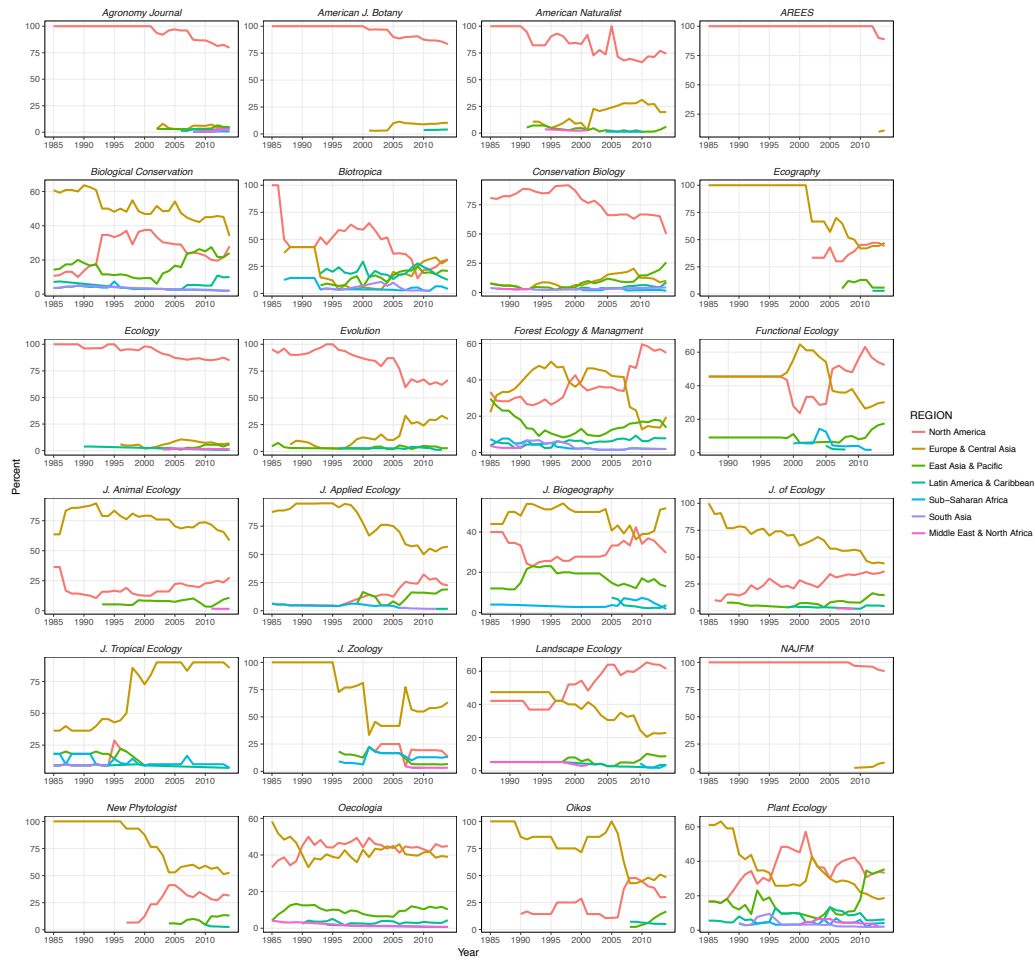

(B) Distribution of Editors by national income category

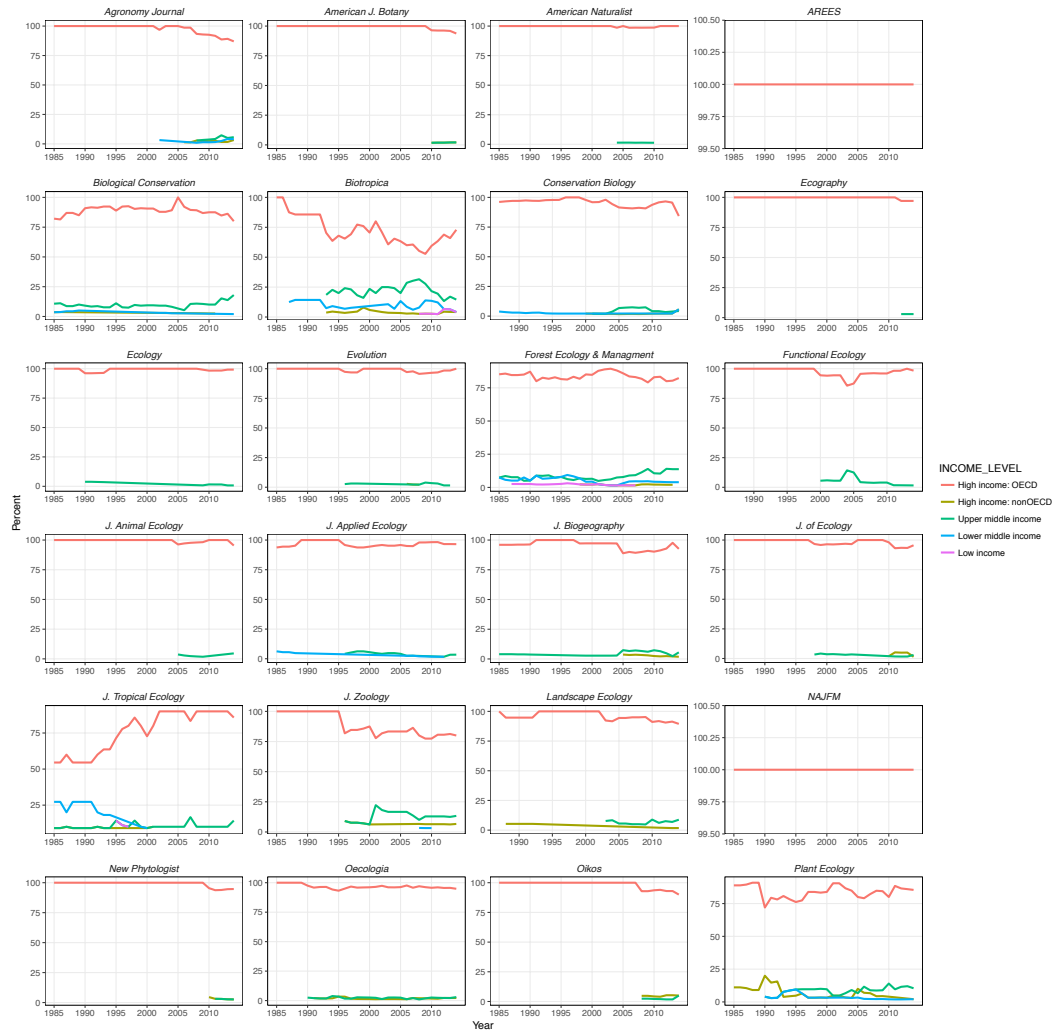

Supplement: Supplementary file [file 131292-4.pdf]
